# Supplementary material
Source: MDPI journal article supplement (https://www.mdpi.com/2073-4395/10/8/1127)
Supplement: s1 [file s1]

### Flower bud development stage (0 - 6)

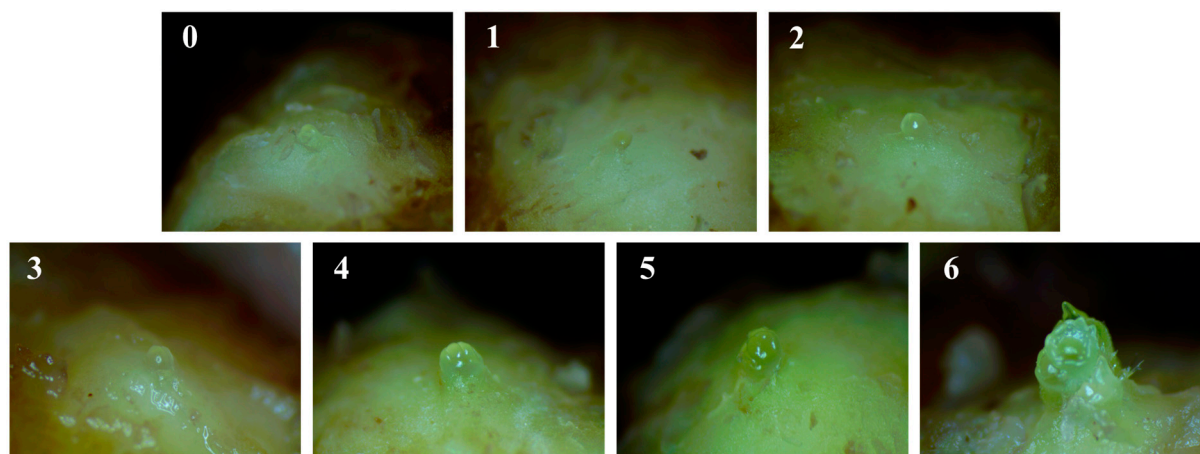

**Figure S1.** Microscopic view of flower bud development stages on the apical meristem of 'Maehyang' strawberry runner plants affected by the nutrient solution resupply period during nursery stage. The flower bud development stage was classified into 7 stages (0 to 6). The stages were: 0, the vegetative apex stage; 1, the early apex enlargement stage; 2, the middle apex enlargement stage; 3, the later apex enlargement stage; 4, the apex division stage; 5, the sepal development stage; and 6, the stamen development stage.
